# Supplementary material
Source: PubMed Central journal article supplement (PMC2492456)
Supplement: 0802496105_0802496105SI.pdf [file 0802496105_0802496105SI.pdf]

# Supporting Information

Dobbins *et al.* 10.1073/pnas.0802496105

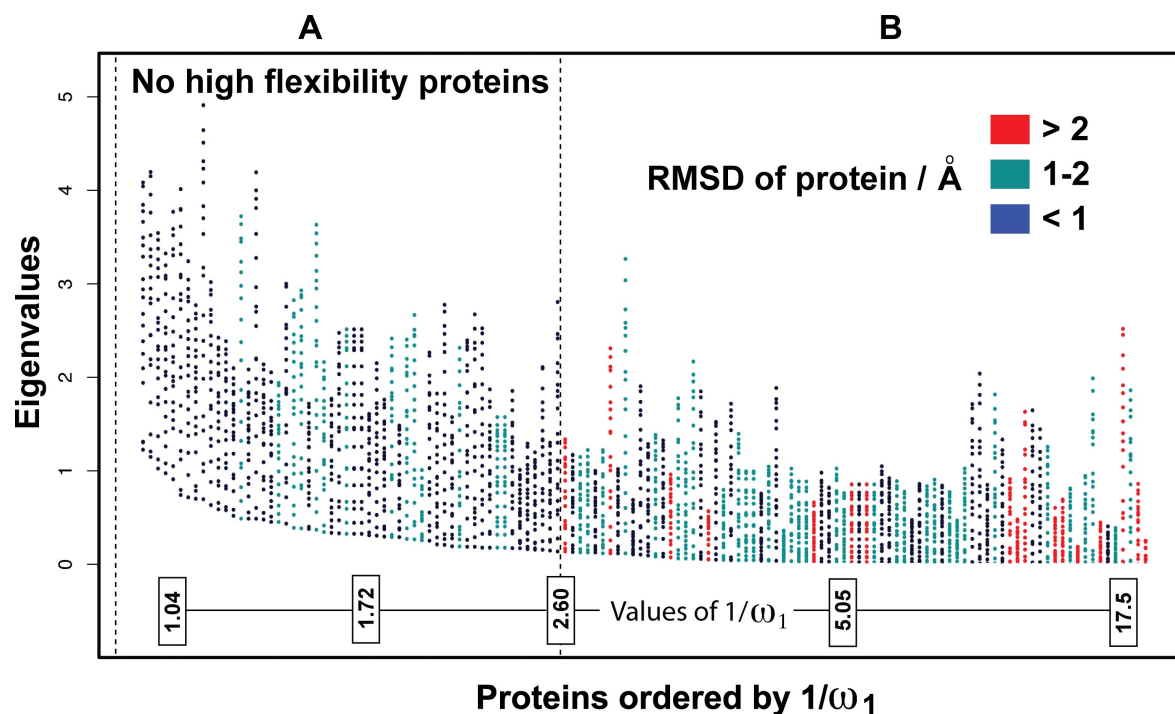

**Fig. S1.** The lowest 20 mode frequencies are shown for each protein in the main dataset. Proteins are ranked in descending order of lowest mode frequency. The spectrum for each protein is colored according to extent of conformational change. The plot is split into two sections A and B, where section A contains no proteins with large conformational change, and B contains the remainder.

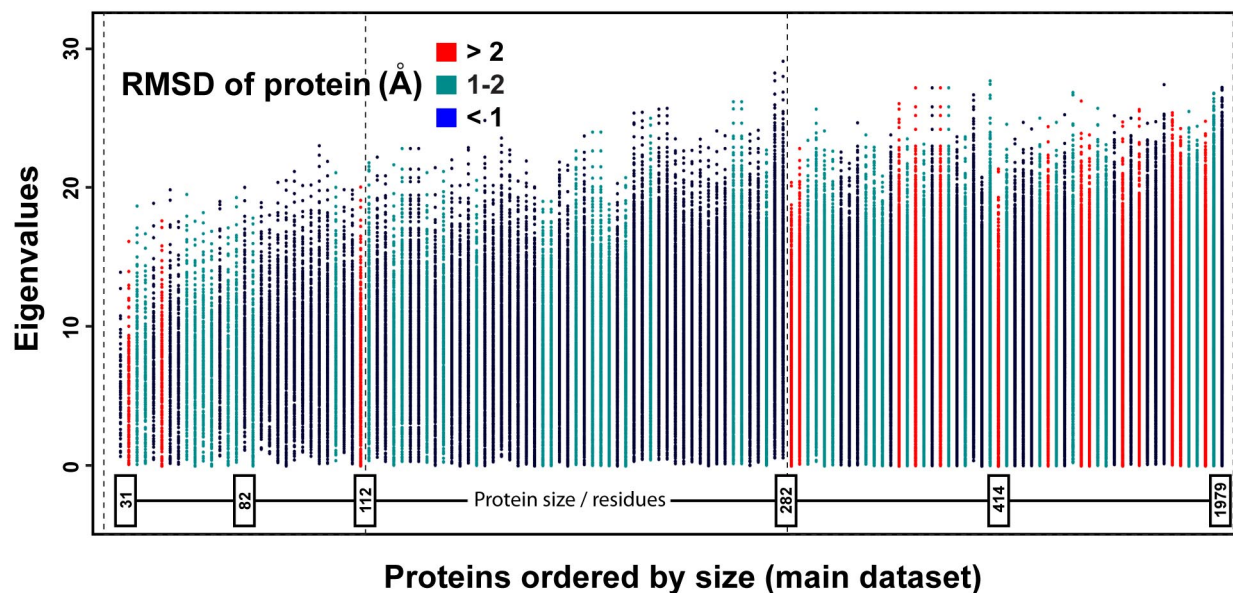

Fig. S2. All mode frequencies are shown for each protein in the main dataset. Proteins are ranked by size (number of residues). The spectrum for each protein is colored according to extent of conformational change.

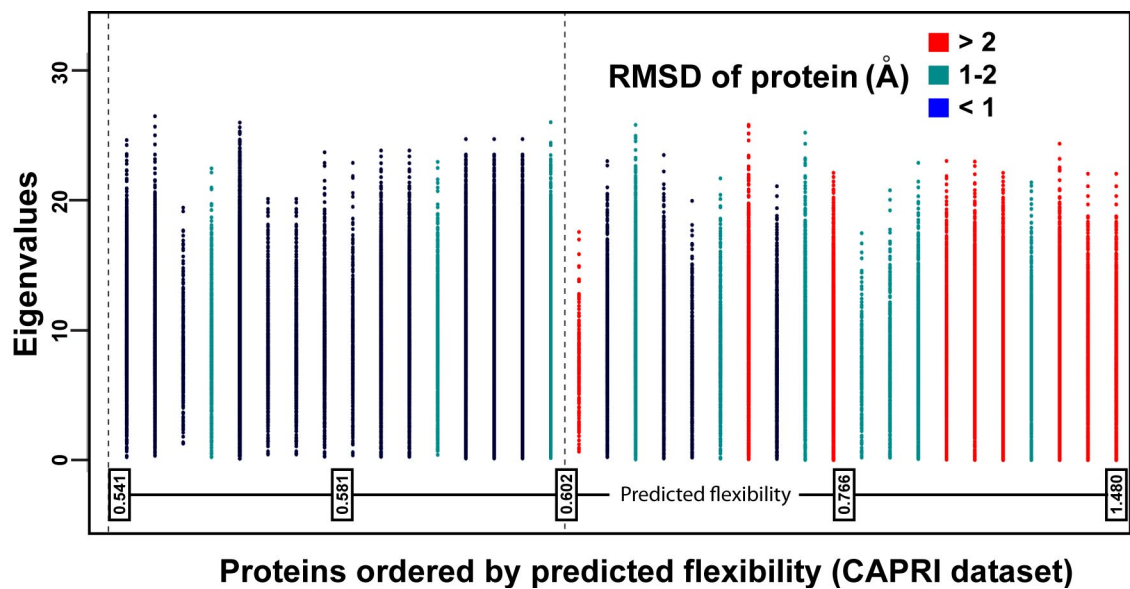

Fig. S3. All mode frequencies are shown for each protein in the CAPRI dataset. Proteins are ranked by predicted flexibility (see Eq. 2). The spectrum for each protein is colored according to extent of conformational change.

Table S1. Main dataset

|    | PDB ID code | Size  | RMSD, Å | $1/\omega_1$ | Predicted flexibility |
|----|-------------|-------|---------|--------------|-----------------------|
| 1  | 1 sup       | 282   | 0.249   | 1.305        | 0.4978                |
| 2  | 1ubn_A      | 274   | 0.28    | 1.295        | 0.507                 |
| 3  | 7nn9        | 388   | 0.247   | 1.605        | 0.5285                |
| 4  | 1c3d        | 294   | 1.1     | 1.68         | 0.5366                |
| 5  | 2cpl        | 164   | 0.524   | 1.187        | 0.5448                |
| 6  | 1trm_A      | 223   | 0.354   | 1.431        | 0.5451                |
| 7  | 2hpr        | 88    | 0.491   | 0.9013       | 0.5454                |
| 8  | 1btp        | 223   | 0.433   | 1.377        | 0.5456                |
| 9  | 1poh        | 85    | 0.709   | 0.9301       | 0.5467                |
| 10 | 1qqu_A      | 223   | 0.49    | 1.419        | 0.5566                |
| 11 | 2tgt        | 223   | 1.28    | 1.471        | 0.5615                |
| 12 | 1 hrc       | 104   | 0.366   | 0.9844       | 0.5631                |
| 13 | 1ycc        | 108   | 0.498   | 1.01         | 0.5643                |
| 14 | 1srr_C      | 121   | 0.803   | 1.247        | 0.5707                |
| 15 | 3min_ABCD   | 1,979 | 0.464   | 5.598        | 0.5709                |
| 16 | 1j06.B      | 533   | 0.745   | 2.338        | 0.5752                |
| 17 | 1a19.B      | 89    | 0.618   | 1.045        | 0.5754                |
| 18 | 1hoe        | 74    | 0.474   | 1.156        | 0.577                 |
| 19 | 1jae        | 472   | 0.396   | 2.644        | 0.5779                |
| 20 | 2rac_A      | 105   | 0.626   | 1.176        | 0.5784                |
| 21 | 2pka_XY     | 222   | 0.781   | 1.694        | 0.5848                |
| 22 | 2nip_AB     | 575   | 4.1     | 3.391        | 0.5896                |
| 23 | 1czp_A      | 98    | 0.813   | 1.5          | 0.5911                |
| 24 | 1aly_ABC    | 439   | 1.65    | 1.927        | 0.5924                |
| 25 | 1nob_F      | 185   | 0.51    | 1.777        | 0.5929                |
| 26 | 1cje_D      | 107   | 1.03    | 1.591        | 0.598                 |
| 27 | 1bvl_BA     | 224   | 0.822   | 2.3          | 0.6009                |
| 28 | 1b1u_A      | 118   | 1.12    | 1.579        | 0.6017                |
| 29 | 3dni        | 258   | 0.407   | 1.819        | 0.6021                |
| 30 | 1pig        | 495   | 0.646   | 2.798        | 0.6038                |
| 31 | 2cga_B      | 245   | 1.48    | 2.303        | 0.6049                |
| 32 | 2cga_B      | 245   | 1.75    | 2.303        | 0.6049                |
| 33 | 1vfa_AB     | 224   | 0.534   | 2.33         | 0.6071                |
| 34 | 1ppi        | 496   | 0.571   | 2.702        | 0.6074                |
| 35 | 3lzt        | 129   | 1.23    | 1.722        | 0.6079                |
| 36 | 3lzt        | 129   | 0.847   | 1.722        | 0.6079                |
| 37 | 3lzt        | 129   | 0.751   | 1.722        | 0.6079                |
| 38 | 821p        | 166   | 0.643   | 1.471        | 0.6091                |
| 39 | 1udh        | 228   | 0.477   | 1.766        | 0.6147                |
| 40 | 8lyz        | 129   | 1.07    | 1.878        | 0.6195                |
| 41 | 9pti        | 58    | 0.554   | 1.419        | 0.6218                |
| 42 | 1f5w_B      | 121   | 0.964   | 1.711        | 0.6218                |
| 43 | 1m08_B      | 131   | 1.73    | 1.817        | 0.6264                |
| 44 | 1yrg_B      | 343   | 0.794   | 4.042        | 0.6274                |
| 45 | 1cd8_AB     | 229   | 0.987   | 2.209        | 0.6285                |
| 46 | 1gcp_B      | 67    | 1.12    | 1.417        | 0.6296                |
| 47 | 1he9_A      | 131   | 0.916   | 2.134        | 0.64                  |
| 48 | 1a43        | 72    | 1.68    | 1.623        | 0.6405                |
| 49 | 1tnd_C      | 316   | 0.54    | 3.253        | 0.6435                |
| 50 | 1cx8_AB     | 1,278 | 1.68    | 6.135        | 0.6435                |
| 51 | 1ias_A      | 330   | 1.92    | 2.661        | 0.6437                |
| 52 | 1tbg_DH     | 405   | 1.96    | 4.663        | 0.6447                |
| 53 | 4pep        | 326   | 0.686   | 3.074        | 0.6449                |
| 54 | 1 gia       | 310   | 1.73    | 3.249        | 0.6481                |
| 55 | 1bv1        | 159   | 0.655   | 1.803        | 0.651                 |
| 56 | 1b39_A      | 290   | 3.29    | 2.608        | 0.6541                |
| 57 | 1hh8_A      | 192   | 0.633   | 2.924        | 0.6581                |
| 58 | 1lu0_A      | 31    | 0.457   | 1.192        | 0.6616                |
| 59 | 1 se4       | 239   | 0.537   | 2.398        | 0.6647                |
| 60 | 1d0n_B      | 729   | 14      | 4.928        | 0.6686                |
| 61 | 1hcl        | 294   | 1.09    | 2.689        | 0.6691                |
| 62 | 1d6o_A      | 107   | 0.382   | 2.239        | 0.6738                |
| 63 | 1m9z_A      | 105   | 0.628   | 2.294        | 0.6741                |
| 64 | 1kdc        | 136   | 0.878   | 2.114        | 0.6787                |

|     | PDB ID code | Size | RMSD, Å | $1/\omega_1$ | Predicted flexibility |
|-----|-------------|------|---------|--------------|-----------------------|
| 65  | 1ste        | 238  | 0.95    | 2.427        | 0.6799                |
| 66  | 1fgn_LH     | 428  | 0.71    | 4.929        | 0.6807                |
| 67  | 1qbl_HL     | 433  | 0.913   | 5.336        | 0.6815                |
| 68  | 2pab_ABCD   | 457  | 0.814   | 2.895        | 0.6834                |
| 69  | 1e6o_HL     | 429  | 1.15    | 5.053        | 0.6859                |
| 70  | 1jpt_HL     | 425  | 0.701   | 5.347        | 0.6884                |
| 71  | 2ugi_B      | 83   | 1.09    | 1.892        | 0.6913                |
| 72  | 1e1n_A      | 455  | 1.07    | 4.138        | 0.6917                |
| 73  | 1rrp_AB     | 338  | 1.6     | 4.484        | 0.7027                |
| 74  | 1m0z_B      | 266  | 1.7     | 3.672        | 0.7063                |
| 75  | 1rgh_B      | 96   | 0.525   | 1.944        | 0.7084                |
| 76  | 1e8z_A      | 839  | 1.55    | 4.652        | 0.713                 |
| 77  | 1jb1_ABC    | 484  | 2.76    | 3.98         | 0.7173                |
| 78  | 1hbp        | 175  | 0.541   | 2.515        | 0.7177                |
| 79  | 3ssi        | 108  | 0.667   | 2.45         | 0.7178                |
| 80  | 1fvu_AB     | 254  | 0.967   | 4.154        | 0.7206                |
| 81  | 1mkf_A      | 372  | 0.617   | 4.971        | 0.7228                |
| 82  | 1mlb_AB     | 432  | 1.03    | 6.237        | 0.7243                |
| 83  | 1a4r_A      | 190  | 1.75    | 2.754        | 0.731                 |
| 84  | 1ay1_HL     | 423  | 1.55    | 5.985        | 0.7372                |
| 85  | 1dqq_CD     | 424  | 0.796   | 6.008        | 0.7375                |
| 86  | 1ijj_B      | 371  | 2.72    | 5.313        | 0.7396                |
| 87  | 1ijj_B      | 371  | 0.888   | 5.313        | 0.7396                |
| 88  | 1ijj_B      | 371  | 2.72    | 5.313        | 0.7396                |
| 89  | 1ijj_B      | 371  | 1.6     | 5.313        | 0.7396                |
| 90  | 2clr_DE     | 376  | 1.12    | 5.252        | 0.7617                |
| 91  | 1gig_LH     | 431  | 5.44    | 7.107        | 0.7652                |
| 92  | 2bnh        | 456  | 1.51    | 8.29         | 0.7742                |
| 93  | 1pne        | 139  | 0.751   | 4.551        | 0.7792                |
| 94  | 1a6z_AB     | 371  | 1.4     | 6.133        | 0.7825                |
| 95  | 1h15_AB     | 369  | 1.36    | 5.948        | 0.7838                |
| 96  | 2ci2_I      | 65   | 0.471   | 2.605        | 0.7868                |
| 97  | 1wer        | 324  | 0.975   | 4.401        | 0.7869                |
| 98  | 1fsc        | 61   | 0.77    | 2.243        | 0.799                 |
| 99  | 1 hpt       | 56   | 1.8     | 2.805        | 0.801                 |
| 100 | 1ly2_A      | 130  | 0.752   | 3.773        | 0.8164                |
| 101 | 1f32_A      | 127  | 1.05    | 3.647        | 0.8198                |
| 102 | 1ixm_AB     | 343  | 1.3     | 5.547        | 0.8365                |
| 103 | 1e6j_P      | 137  | 1.46    | 4.181        | 0.855                 |
| 104 | 1k9b_A      | 58   | 1.03    | 2.226        | 0.8734                |
| 105 | 1hrp_AB     | 196  | 1.83    | 4.19         | 0.8811                |
| 106 | 1hrp_AB     | 196  | 1.83    | 4.19         | 0.8811                |
| 107 | 1f59_A      | 440  | 2.96    | 8.535        | 0.8844                |
| 108 | 1tfh_A      | 202  | 1.39    | 5.365        | 0.91                  |
| 109 | 1s6p_AB     | 979  | 3.63    | 10.84        | 0.9101                |
| 110 | 1gjr_A      | 295  | 1.07    | 8.609        | 0.9111                |
| 111 | 1bec        | 238  | 0.891   | 5.79         | 0.9164                |
| 112 | 1kw2_B      | 453  | 2.12    | 7.308        | 0.9167                |
| 113 | 1tfh_B      | 182  | 1.08    | 4.875        | 0.9363                |
| 114 | 1tfh_B      | 182  | 1       | 4.875        | 0.9363                |
| 115 | 1fc1_A      | 206  | 0.813   | 7.106        | 0.9369                |
| 116 | 1bx8        | 50   | 2.13    | 2.78         | 0.9579                |
| 117 | 2vpf_GH     | 189  | 0.776   | 6.914        | 0.9857                |
| 118 | 1dks_A      | 76   | 1.05    | 3.702        | 1.017                 |
| 119 | 1ccz_A      | 171  | 0.764   | 6.306        | 1.019                 |
| 120 | 1cmw_A      | 818  | 1.42    | 16.23        | 1.026                 |
| 121 | 1qjb_AB     | 460  | 2.34    | 11.99        | 1.074                 |
| 122 | 1hnf        | 179  | 0.851   | 7.981        | 1.115                 |
| 123 | 1jvm_A      | 97   | 0.701   | 6.878        | 1.131                 |
| 124 | 1ecz_AB     | 284  | 2.29    | 8.472        | 1.135                 |
| 125 | 1fqi_A      | 133  | 0.914   | 7.862        | 1.138                 |
| 126 | 1unk_D      | 87   | 1.18    | 6.998        | 1.154                 |
| 127 | 1tgk        | 112  | 2.22    | 7.547        | 1.171                 |
| 128 | 1gri_B      | 211  | 1.14    | 11.16        | 1.284                 |
| 129 | 1i49_AB     | 402  | 0.949   | 15.07        | 1.39                  |

|     | PDB ID code | Size | RMSD, Å | $1/\omega_1$ | Predicted flexibility |
|-----|-------------|------|---------|--------------|-----------------------|
| 130 | 1qfk_HL     | 357  | 6.21    | 18.52        | 1.419                 |
| 131 | 1dol        | 72   | 1.24    | 11.26        | 1.838                 |
| 132 | 1egl        | 70   | 1.51    | 17.61        | 2.434                 |
| 133 | 1bdd        | 60   | 3.13    | 17.49        | 2.657                 |
| 134 | 1ern_AB     | 414  | 2.46    | 3.16E+04     | 2693                  |

Proteins from the main dataset in order of predicted flexibility (see Eq. 2). The following information is given: PDB ID code, number of residues (used for ranking proteins in Fig. S2), observed RMSD (in Å), inverse of the lowest-frequency mode (used for ranking of proteins in Fig. S1), and predicted flexibility (used for ranking of proteins in Fig. 4).

**Table S2. Features of the high-flexibility dataset**

|    | Protein name               | PDB ID code | In complex with | RMSD, Å | RMSD BS, Å | Dynamic domain | Predicted flexibility rank | Max overlap |
|----|----------------------------|-------------|-----------------|---------|------------|----------------|----------------------------|-------------|
| 1  | Staphylococcus A           | 1bdd        | 1fc1_AB         | 3.13    | 2.73       | N              | 2                          | 0.4         |
| 2  | Ran GTPase                 | 1qg4_A      | 1a12_A          | 2.63    | 3.65       | N              | –                          | 0.26        |
| 3  | 14-3-3                     | 1qjb_AB     | 1kuy_A          | 2.34    | 2.73       | N              | 6                          | 0.49        |
| 4  | Actin                      | 1ijj_B      | 3dni            | 2.72    | 9.47       | N              | 12                         | 0.56        |
| 5  | Erythropoietin             | 1buy_A      | 1ern_AB         | 4.10    | 2.18       | N              | –                          | 0.41        |
| 6  | FAB                        | 1gig_LH     | 2viu_A          | 5.44    | 7.57       | Y              | 11                         | 0.91        |
| 7  | TGF- $\beta$               | 1tgk        | 1m9z_A          | 2.22    | 0.79       | N              | 4                          | 0.28        |
| 8  | Actin                      | 1ijj_B      | 1pne            | 2.72    | 1.51       | Y              | 13                         | 0.57        |
| 9  | Coagulation factor VIIa    | 1qfk_HL     | 1tfh_B          | 6.21    | 12.52      | Y              | 3                          | 0.71        |
| 10 | Ran GTPase                 | 1qg4_A      | 1f59_A          | 3.91    | 2.31       | N              | –                          | 0.41        |
| 11 | HPr kinase C-ter domain    | 1jb1_ABC    | 2hpr            | 2.79    | 3.40       | N              | 14                         | 0.63        |
| 12 | HIV1 reverse transcriptase | 1s6p_AB     | 2hmi_CD         | 3.63    | 5.75       | Y              | 9                          | 0.53        |
| 13 | Ecotin                     | 1ecz_AB     | 1trm_A          | 2.29    | 2.95       | N              | 5                          | 0.62        |
| 14 | EPO receptor               | 1ern_AB     | 1buy_A          | 2.46    | 2.65       | Y              | 1                          | 0.62        |
| 15 | Vitamin D binding          | 1kw2_B      | 1ijj_B          | 2.12    | 1.74       | Y              | 8                          | 0.68        |
| 16 | Nitrogenase Fe             | 2nip_AB     | 3min_ABCD       | 4.10    | 3.56       | N              | 17                         | 0.83        |
| 17 | CDK2 kinase                | 1b39_A      | 1fpz_F          | 3.29    | 5.27       | Y              | 16                         | 0.33        |
| 18 | Gelsolin                   | 1d0n_B      | 1ijj_B          | 14.05   | 12.52      | Y              | 15                         | 0.30        |
| 19 | Importin- $\beta$          | 1f59_A      | 1qg4_A          | 2.96    | 3.35       | Y              | 10                         | 0.75        |
| 20 | Hirustatin                 | 1bx8        | 2pka_XY         | 2.13    | 2.10       | Y              | 7                          | 0.47        |

Proteins from the high-flexibility dataset. The following information is given: PDB ID code, the PDB ID code of the complexation partner, RMSD (in Å), binding site (BS) RMSD (in Å), presence of dynamic domain (defined by software DynDom, see *Materials and Methods*), rank of predicted flexibility relative to the other high-flexibility proteins (ranging from 1 to 17 because proteins with  $K_{\text{lowest}} < 0.03$  are excluded), and the maximum overlap of the lowest 20 modes.

**Table S3. More features of the high-flexibility dataset**

|    | PDB ID code | Collectivity observed | Collectivity NMs | Overlap NM7 ( $O_7$ ) | Overlap NM8 ( $O_8$ ) | Overlap NM9 ( $O_9$ ) | Periphery/core >2 |
|----|-------------|-----------------------|------------------|-----------------------|-----------------------|-----------------------|-------------------|
| 1  | 1bdd        | 0.04                  | 0.48             | 0.02                  | 0.14                  | 0.17                  | Y                 |
| 2  | 1qg4_A      | 0.01                  | 0.35             | 0.03                  | 0.07                  | 0.06                  | Y                 |
| 3  | 1qjb_AB     | 0.54                  | 0.12             | 0.33                  | 0.31                  | 0.07                  | Y                 |
| 4  | 1ijj_B      | 0.08                  | 0.08             | 0.56                  | 0.13                  | 0.20                  | N                 |
| 5  | 1buy_A      | 0.02                  | 0.33             | 0.03                  | 0.36                  | 0.06                  | N                 |
| 6  | 1gig_LH     | 0.76                  | 0.75             | 0.91                  | 0.28                  | 0.08                  | N                 |
| 7  | 1tgk        | 0.54                  | 0.23             | 0.04                  | 0.10                  | 0.05                  | N                 |
| 8  | 1ijj_B      | 0.08                  | 0.07             | 0.57                  | 0.27                  | 0.03                  | N                 |
| 9  | 1qfk_HL     | 0.37                  | 0.22             | 0.04                  | 0.71                  | 0.09                  | N                 |
| 10 | 1qg4_A      | 0.01                  | 0.19             | 0.01                  | 0.08                  | 0.05                  | N                 |
| 11 | 1jb1_ABC    | 0.10                  | 0.21             | 0.00                  | 0.01                  | 0.63                  | N                 |
| 12 | 1s6p_AB     | 0.45                  | 0.63             | 0.53                  | 0.32                  | 0.49                  | N                 |
| 13 | 1ecz_AB     | 0.51                  | 0.56             | 0.16                  | 0.62                  | 0.51                  | N                 |
| 14 | 1ern_AB     | 0.61                  | 0.59             | 0.01                  | 0.01                  | 0.01                  | N                 |
| 15 | 1kw2_B      | 0.56                  | 0.54             | 0.68                  | 0.17                  | 0.12                  | N                 |
| 16 | 2nip_AB     | 0.72                  | 0.73             | 0.07                  | 0.83                  | 0.02                  | N                 |
| 17 | 1b39_A      | 0.37                  | 0.19             | 0.25                  | 0.33                  | 0.04                  | Y                 |
| 18 | 1d0n_B      | 0.54                  | 0.50             | 0.14                  | 0.08                  | 0.11                  | N                 |
| 19 | 1f59_A      | 0.60                  | 0.55             | 0.42                  | 0.75                  | 0.26                  | Y                 |
| 20 | 1bx8        | 0.60                  | 0.67             | 0.12                  | 0.47                  | 0.23                  | N                 |

Proteins from the high-flexibility dataset. The following information is given: PDB ID code, collectivity ( $K$ ) of observed conformational change, and lowest-frequency normal mode (see Eq. 5), overlap ( $O_j$ ) of the three lowest-frequency (nontrivial) normal modes (see Eq. 4), and whether the ratio of observed motion of peripheral to core residues in BS is >2.



Table S4. CAPRI dataset

|    | CAPRI target           | Size  | RMSD, Å | $1/\omega_1$ | Predicted flexibility |
|----|------------------------|-------|---------|--------------|-----------------------|
| 1  | capri_016_B            | 301   | 0.97    | 0.229        | 0.541                 |
| 2  | capri_014_A.swissmodel | 309   | 0.83    | 0.337        | 0.542                 |
| 3  | capri_001_A            | 86    | 0.53    | 1.263        | 0.550                 |
| 4  | capri_017_B.swissmodel | 190   | 1.65    | 0.226        | 0.573                 |
| 5  | capri_002_ABC          | 1,194 | 0.63    | 0.099        | 0.577                 |
| 6  | capri_011_A            | 140   | 0.44    | 0.439        | 0.580                 |
| 7  | capri_012_A            | 140   | 0.44    | 0.439        | 0.580                 |
| 8  | capri_018_A            | 182   | 0.65    | 0.270        | 0.581                 |
| 9  | capri_026_B            | 111   | 0.60    | 0.364        | 0.584                 |
| 10 | capri_016_A            | 274   | 0.45    | 0.253        | 0.590                 |
| 11 | capri_017_A            | 274   | 0.40    | 0.253        | 0.590                 |
| 12 | capri_025_A            | 165   | 1.10    | 0.405        | 0.593                 |
| 13 | capri_004_A            | 496   | 0.41    | 0.129        | 0.596                 |
| 14 | capri_005_A            | 496   | 0.40    | 0.129        | 0.596                 |
| 15 | capri_006_A            | 496   | 0.37    | 0.129        | 0.596                 |
| 16 | capri_018_B            | 370   | 1.13    | 0.156        | 0.602                 |
| 17 | capri_011_B.swissmodel | 56    | 4.54    | 0.651        | 0.620                 |
| 18 | capri_007_A            | 220   | 0.49    | 0.230        | 0.631                 |
| 19 | capri_026_A            | 417   | 1.71    | 0.058        | 0.649                 |
| 20 | capri_027_A            | 200   | 0.92    | 0.127        | 0.661                 |
| 21 | capri_021_B            | 125   | 0.93    | 0.187        | 0.700                 |
| 22 | capri_022_A            | 135   | 1.48    | 0.102        | 0.700                 |
| 23 | capri_001_CEF          | 506   | 2.76    | 0.063        | 0.701                 |
| 24 | capri_027_B            | 158   | 0.78    | 0.083        | 0.743                 |
| 25 | capri_020_A            | 276   | 1.65    | 0.027        | 0.766                 |
| 26 | capri_010_B            | 764   | 11.46   | 0.009        | 0.766                 |
| 27 | capri_022_B            | 62    | 1.29    | 0.199        | 0.769                 |
| 28 | capri_019_A.swissmodel | 102   | 1.61    | 0.183        | 0.774                 |
| 29 | capri_021_A            | 195   | 1.27    | 0.079        | 0.805                 |
| 30 | capri_007_R            | 236   | 2.22    | 0.030        | 0.911                 |
| 31 | capri_013_A            | 246   | 10.01   | 0.019        | 0.922                 |
| 32 | capri_010_A            | 382   | 11.33   | 0.009        | 1.080                 |
| 33 | capri_008_A            | 164   | 1.88    | 0.015        | 1.240                 |
| 34 | capri_020_B.swissmodel | 299   | 8.31    | 0.007        | 1.270                 |
| 35 | capri_009_A            | 206   | 12.75   | 0.006        | 1.480                 |
| 36 | capri_009_B            | 206   | 12.75   | 0.006        | 1.480                 |

Proteins from the CAPRI dataset in order of predicted RMSD (see Eq. 2). The following information is given: Capri target name, number of residues, observed RMSD (in Å), inverse of the lowest-frequency mode, and predicted flexibility (used for ranking of proteins in Fig. S3). A number of the protein structures were produced by using swiss-model (Schwede, *et al.*, 2003), which will impact on the expected accuracy of the calculated RMSD. Indeed, protein 17, which is built by using a homology model with only 50% sequence identity, is the only high-flexibility protein in the lower 60% of Fig. S3.

**Table S5. Input parameters for calculating normal modes**

|                                                          |                   |
|----------------------------------------------------------|-------------------|
| Input parameters for PDBMAT (for use in pdbmat.dat)      |                   |
| Coordinate FILENAME                                      | pdbmat.structure  |
| INTERACTiOn DISTAnce CUTOF                               | 12.000            |
| INTERACTiOn FORCE CONSTant                               | 1.000             |
| Origin of MASS values                                    | COOR              |
| Output PRINTing level                                    | 0                 |
| Bond DEFINITION                                          | NONE              |
| Maximum bond LENGTH                                      | 0.000             |
| BOND FORCE CONSTant                                      | 0.000             |
| ANGLE FORCE CONSTant                                     | 0.000             |
| LevelSHIFT                                               | 1.0E-09           |
| Matrix FORMAT                                            | FREE              |
| Input parameters for DIAGRTB<br>(for use in diagrtb.dat) |                   |
| MATRIX filename                                          | pdbmat.sdijf      |
| COORDinates filename                                     | structure.pdb     |
| Eigenvector OUTPut filename                              | diagrtb.eigenfacs |
| Nb of VECTors required                                   | 10000             |
| EigeNVALues chosen                                       | LOWE              |
| Type of SUBStructuring                                   | NONE              |
| Nb of residues per BLOCk                                 | 1                 |
| Origin of MASS values                                    | CONS              |
| Temporary files cleaning                                 | ALL               |
| MATRIX FORMat                                            | FREE              |
| Output PRINTing level                                    | 0                 |

Parameter files for calculation of the normal modes. The normal modes were calculated with the programs PDBMAT and DIAGRTB (each downloadable at [www.igs.cnrs-mrs.fr/elNemo](http://www.igs.cnrs-mrs.fr/elNemo)). PDBMAT requires only a PDB file as input. When PDBMAT is run, a file called `pdbmat.dat_run` is created. This can be edited and saved as `pdbmat.dat` and sets the values of parameters for future runs. DIAGRTB requires the PDB file and the output from PDBMAT as input. The file `diagrtb.dat_run` is created as above and can be altered in the same way to set the parameters. Further details can be found on the `elNemo` website.

Table S6. Benchmark proteins

| Protein 1 | Protein 2 | Complex    | Protein 1 | Protein 2 | Complex      |
|-----------|-----------|------------|-----------|-----------|--------------|
| 1qqu_A    | 1ba7_B    | 1avx_A:B   | 1nca_HL   | 7nn9      | 1nca_HL:N    |
| 1rgh_B    | 1a19_B    | 1ay7_A:B   | 1nsn_HL   | 1kdc      | 1nsn_HL:S    |
| 1pig      | 1 hoe     | 1bvn_P:T   | 1qfw_HL   | 1hrp_AB   | 1qfw_HL:AB   |
| 2cga_B    | 1 hpt     | 1cgi_E:I   | 1qfw_IM   | 1hrp_AB   | 1qfw_IM:AB   |
| 2tgt      | 1k9b_A    | 1d6r_A:I   | 2jel_HL   | 1poh      | 2jel_HL:P    |
| 9rsa_B    | 2bnh      | 1dfj_E:I   | 1fvu_AB   | 1auq      | 1ijk_BC:A    |
| 1e1n_A    | 1cje_D    | 1e6e_A:B   | 1rrp_AB   | 1yrg_B    | 1k5d_AB:C    |
| 1eax_A    | 9pti      | 1eaw_A:B   | 1auq      | 1m0z_B    | 1m10_A:B     |
| 1gjr_A    | 1czp_A    | 1ewy_A:C   | 3min_ABCD | 2nlp_AB   | 1n2c_ABCD:EF |
| 1trm_A    | 1ecz_AB   | 1ezu_C:AB  | 6q21_D    | 1wer      | 1wq1_R:G     |
| 1fgn_LH   | 1tfh_A    | 1ahw_AB:C  | 1qfk_HL   | 1tfh_B    | 1fak_HL:T    |
| 1bvl_BA   | 3lzt      | 1bvk_DE:F  | 1fpz_F    | 1b39_A    | 1fq1_A:B     |
| 1dqq_CD   | 3lzt      | 1dqj_AB:C  | 1ijj_B    | 1d0n_B    | 1h1v_A:G     |
| 1e6o_HL   | 1a43      | 1e6j_HL:P  | 1qg4_A    | 1f59_A    | 1ibr_A:B     |
| 1qg4_A    | 1oun_AB   | 1a2k_C:AB  | 2pka_XY   | 1bx8      | 1hia_AB:I    |
| 2cpl      | 1e6j_P    | 1ak4_A:D   | 1jae      | 1b1u_A    | 1tmq_A:B     |
| 1d6o_A    | 1ias_A    | 1b6c_A:B   | 2clr_DE   | 1cd8_AB   | 1akj_AB:DE   |
| 1hcl      | 1dks_A    | 1buh_A:B   | 2pab_ABCD | 1hbp      | 1rlb_ABCD:E  |
| 1mh1      | 1hh8_A    | 1e96_A:B   | 1i9r_HL   | 1aly_ABC  | 1i9r_HL:ABC  |
| 1ixm_AB   | 1srr_C    | 1f51_AB:E  | 1jb1_ABC  | 2hpr      | 1kkl_ABC:H   |
| 1bdd      | 1fc1_A    | 1fc2_C:D   | 1mkf_A    | 1dol      | 1ml0_A:D     |
| 1tnd_C    | 1fqi_A    | 1fqi_A:B   |           |           |              |
| 1gri_B    | 1gcp_B    | 1gcp_B:C   |           |           |              |
| 1bj1_HL   | 2vpf_GH   | 1bj1_HL:VW |           |           |              |
| 1fsk_BC   | 1bv1      | 1fsk_BC:A  |           |           |              |
| 1iqd_AB   | 1d7p_M    | 1iqd_AB:C  |           |           |              |
| 1k4c_AB   | 1jvm_A    | 1k4c_AB:C  |           |           |              |
| 1kxq_H    | 1ppi      | 1kxq_H:A   |           |           |              |
| 2cga_B    | 1egl      | 1acb_E:I   |           |           |              |
| 1ay1_HL   | 1cmw_A    | 1bgx_HL:T  |           |           |              |
| 1gia      | 1tbg_DH   | 1gp2_A:BG  |           |           |              |
| 1a4r_A    | 1rgp      | 1grn_A:B   |           |           |              |
| 821p      | 1e8z_A    | 1he8_B:A   |           |           |              |
| 1qg4_A    | 1a12_A    | 1i2m_A:B   |           |           |              |
| 1qjb_AB   | 1kuy_A    | 1ib1_AB:E  |           |           |              |
| 1ijj_B    | 3dni      | 1atn_A:D   |           |           |              |
| 1a6z_AB   | 1cx8_AB   | 1de4_AB:CF |           |           |              |
| 1buy_A    | 1ern_AB   | 1eer_A:BC  |           |           |              |
| 2hmi_CD   | 1s6p_AB   | 2hmi_CD:AB |           |           |              |
| 4pep      | 1f32_A    | 1f34_A:B   |           |           |              |
| 1j06_B    | 1fsc      | 1mah_A:F   |           |           |              |
| 1btp      | 1lu0_A    | 1ppe_E:I   |           |           |              |
| Protein 1 | Protein 2 | Complex    |           |           |              |
| 1udh      | 2ugi_B    | 1udi_E:I   |           |           |              |
| 2bbk_JM   | 2rac_A    | 2mta_HL:A  |           |           |              |
| 1ccp      | 1ycc      | 2pcc_A:B   |           |           |              |
| 1sup      | 3ssi      | 2sic_E:I   |           |           |              |
| 1ubn_A    | 2ci2_I    | 2sni_E:I   |           |           |              |
| 1unk_D    | 1m08_B    | 7cei_A:B   |           |           |              |
| 1jpt_HL   | 1tfh_B    | 1jps_HL:T  |           |           |              |
| 1mlb_AB   | 3lzt      | 1mlc_AB:E  |           |           |              |
| 1vfa_AB   | 8lyz      | 1vfb_AB:C  |           |           |              |
| 1qbl_HL   | 1hrc      | 1wej_HL:F  |           |           |              |
| 1gig_LH   | 2viu_A    | 2vis_AB:C  |           |           |              |
| 1c3d      | 1ly2_A    | 1ghq_A:B   |           |           |              |
| 1mh1      | 1 he9_A   | 1 he1_C:A  |           |           |              |
| 1mh1      | 1i49_AB   | 1i4d_D:AB  |           |           |              |
| 1nob_F    | 1f5w_B    | 1kac_A:B   |           |           |              |
| 1h15_AB   | 1ste      | 1klu_AB:D  |           |           |              |
| 1tgk      | 1m9z_A    | 1ktz_A:B   |           |           |              |
| 1ijj_B    | 1kw2_B    | 1kxp_A:D   |           |           |              |
| 1hnf      | 1ccz_A    | 1qa9_A:B   |           |           |              |
| 1bec      | 1se4      | 1sbb_A:B   |           |           |              |
| 1ijj_B    | 1pne      | 2btf_A:P   |           |           |              |

All proteins in docking benchmark set. The PDB ID codes are shown for each of the components and also the complex along with relevant chain information.
